# Supplementary material
Source: Research Square preprint supplement (doi:10.21203/rs.3.rs-9097389/v1)
Supplement: Supplementary file 1 [file d5f0cf48350de66e79783453.docx]

This questionnaire will be utilized for the production of an article about the vaccination and immunity against hepatitis B. The article will be produced by the undergraduate students Yuri Felix, Isabella Siqueira, Letícia Colares and Júlia de Araújo, under the guidance of Professor Dr. Silvia Fernandes.

Age

___________________

Sex

( ) Female

( ) Male

( ) Other:____________

Have you received all three doses of the hepatitis B vaccine?

( ) Yes

( ) No

In your opinion, do you believe that you are protected, that is, immune to the virus after the three doses?

( ) Yes

( ) No

Did you do the serological testing to check for the presence of anti-HBs antibodies?

( ) Yes

( ) No

If the previous answer was YES, what was the result of the serology test?

( ) Reactive

( ) Non-Reactive

( ) Not Performed

Do you authorize the use of your data for the production of this article?

( ) Yes

( ) No
